# Supplementary material for: Multi-Modal AI Plastic Surgery Diagnosis and Decision-Making System: Integration of Deep Learning and Psychological Assessment
Source: Research Square preprint supplement (doi:10.21203/rs.3.rs-6233674/v1), 2025-04-07
Supplement: Supplementary file 1 [file faacd076e3e4fe8a0a7c378d.docx]

1. Name:

2. Your gender

male

female

3. Please fill in the date

4. Please select your main place of work and life

5. Your age

6. Educational background

Primary school and below

middle school

university

Graduate degree or above

7. Marital status

unmarried

married

other

8. Do you currently have a job

yes

no

9. What is the nature of your job

Enterprises and public institutions

Freelancers, flexible employment

soldier

Professional technical personnel

Business and service industry practitioners

other

10. Your length of service

Within 1 year

1-3 years

3-10 years

10-30 years

Over 30 years

Retired or retired

11. Do you think the epidemic has had an impact on your income

No changes

increase

reduce

12. Do you think the epidemic has had an impact on your family's income

Not affected

Slightly affected (less than 20% of total revenue)

Significant impact (approximately 20-50% of total revenue)

Significant impact (accounting for over 50% of total revenue)

13. Do you think the epidemic will have an impact on your professional employment

yes

no

14. Your purpose in attending the plastic surgery department is

Skin management

repair

Plastic surgery (double eyelid surgery, nose augmentation, liposuction, etc.)

lump

Injection (botulinum toxin, hyaluronic acid, fat)

Scar treatment

15. Which part of your body or face are you most satisfied with

16. What part of the body or face do you currently want to change the most

17. What is the problem you most want to solve during your visit to the plastic surgery department

18. Do you think that changing this area would have the following effects

family life

Personal emotions

income

Job opportunities

other

19. Have you ever visited a beauty and plastic surgery hospital or institution

yes

no

What is the diagnosis given to you by the doctor

21. Action ability - I move around

nothing to

It's a bit difficult

Moderate difficulty

There are serious difficulties

I can't move around

22. Self care - I take a shower or dress myself

nothing to

It's a bit difficult

Moderate difficulty

There are serious difficulties

I can't take care of myself

23. Daily activities (such as work, study, household chores, family or leisure activities)

nothing to

It's a bit difficult

Moderate difficulty

There are serious difficulties

I am unable to engage in daily activities

24. Pain or discomfort

No pain or discomfort

There is a slight pain or discomfort

Moderate pain or discomfort

Severe pain or discomfort

Has very severe pain or discomfort

25. Anxiety or Depression

No anxiety or depression

A little anxious or depressed

Moderate anxiety or depression

Severe anxiety or depression

Has very serious anxiety or depression

26. We would like to know the quality of your health today. This scale has numbers ranging from 0 to 100 on the chest. 100 represents the best health condition you can imagine. 0 represents the worst health condition you can imagine.

Do you think you are——

Explanation for questions 27-35: No: No or very little time (within the past week, such situations occurred on no more than one day); A few days: a small portion of the time (within the past week, there have been 1-3 days of such situations); More than half of the time: quite a lot of time (in the past week, there have been such situations about 4 days). Almost every day: the vast majority or all of the time (in the past week, there have been 5-7 days of such situations).

27. I'm not interested in doing anything, it's not interesting

No

A few days

More than half of the time

Almost every day

Feeling low, depressed, and hopeless at 28

No

A few days

More than half of the time

Almost every day

Difficulty falling asleep, always awake, or sleeping too much, drowsy

No

A few days

More than half of the time

Almost every day

I often feel very tired and lethargic at 30

No

A few days

More than half of the time

Almost every day

31. Poor taste or overeating

No

A few days

More than half of the time

Almost every day

32. I am dissatisfied with myself, thinking that I am a failure or causing embarrassment to my family

No

A few days

More than half of the time

Almost every day

33 Unable to concentrate, even when reading newspapers or watching TV, memory declines

No

A few days

More than half of the time

Almost every day

34. Move or speak slowly enough to attract people's attention, or just the opposite, restless, irritable, irritable, and moving around

No

A few days

More than half of the time

Almost every day

35. It's better to have the thought of dying than to think about how to hurt oneself

No

A few days

More than half of the time

Almost every day

36-50 Explanation: How often have the following symptoms appeared in your life in the past two weeks?

Feeling nervous, anxious, or eager

No

A few days

More than half of the time

Almost every day

37 Unable to stop or control concerns

No

A few days

More than half of the time

Almost every day

38 Worried too much about various things

No

A few days

More than half of the time

Almost every day

39. It's hard to relax

No

A few days

More than half of the time

Almost every day

Unable to sit still due to anxiety

No

A few days

More than half of the time

Almost every day

41 becomes easily annoyed or impatient

No

A few days

More than half of the time

Almost every day

42 feels as if something terrible will happen and is afraid

No

A few days

More than half of the time

Almost every day

43. If you confirm these issues (as mentioned in questions 36-42), how much difficulty have they caused you in your work, handling family affairs, or interacting with others

It's not difficult at all

It's a bit difficult

Very difficult

Extremely difficult

Describe the severity of your insomnia problem in the past 2 weeks

44. Difficulty falling asleep

None

Mild

Moderate

Severe

Extremely severe

45. Difficulty in maintaining sleep

None

Mild

Moderate

Severe

Extremely severe

46. Wake up early

None

Mild

Moderate

Severe

Extremely severe

47. Satisfaction with your current sleep mode

Very satisfied

Satisfied

General

Not satisfied

Very dissatisfied

48. To what extent do you think your sleep problems have disrupted your daytime functions (such as daytime fatigue, ability to handle work and daily affairs, attention, memory, emotions, etc.)

No interference

Slight

Some

More

A lot of interference

49. To what extent has your insomnia problem affected or damaged your quality of life

No

A little bit

Some

More

Many

50. To what extent do you have concerns/frustrations about your current sleep problems

No

A little bit

Some

More

Many

Please explain how much impact this incident has had on you based on your experience within the past 7 days

51. Anything related to COVID-19 will trigger feelings at that time.

never

little

Sometimes

often

always

I find it difficult to sleep peacefully until dawn.

never

little

Sometimes

often

always

53. Other things will remind me of COVID-19.

never

little

Sometimes

often

always

54. I feel that I am easily stimulated and angry.

never

little

Sometimes

often

always

55. Whenever I think of COVID-19 or other things that remind me of it, I will try not to upset myself.

never

little

Sometimes

often

always

56. Even if I don't want to think about COVID-19, I will think about it.

never

little

Sometimes

often

always

57. It seems to me that COVID-19 is not true or has never happened.

never

little

Sometimes

often

always

58. I try to stay away from everything that reminds me of COVID-19.

never

little

Sometimes

often

always

59. The picture of COVID-19 will suddenly appear in my mind.

never

little

Sometimes

often

always

I feel neurotic and easily frightened.

never

little

Sometimes

often

always

61. I try not to think about COVID-19.

never

little

Sometimes

often

always

62. I realized that I still had many feelings about COVID-19, but I did not deal with them.

never

little

Sometimes

often

always

63. I feel a little numb to COVID-19.

never

little

Sometimes

often

always

64. I found that my behavior and feelings seemed to return to those of COVID-19.

never

little

Sometimes

often

always

65. I find it difficult to fall asleep.

never

little

Sometimes

often

always

66. I have strong emotional fluctuations due to COVID-19.

never

little

Sometimes

often

always

67. I want to forget about COVID-19.

never

little

Sometimes

often

always

68. I feel like I have difficulty concentrating.

never

little

Sometimes

often

always

69. Things that remind me of COVID-19 will cause reflection on me, such as sweating, dyspnea, dizziness and heartbeat.

never

little

Sometimes

often

always

70. I once dreamed about COVID-19.

never

little

Sometimes

often

always

I feel very alert or guarded.

never

little

Sometimes

often

always

72. I try not to mention COVID-19.

never

little

Sometimes

often

always

73. Poor sleep

Strongly agree

Most agree

I quite agree

Partial agreement

Completely disagree

74. Unable to live normally due to pain

Strongly agree

Most agree

I quite agree

Partial agreement

Completely disagree

75. Wounds are difficult to heal

Strongly agree

Most agree

I quite agree

Partial agreement

Completely disagree

76. Easy to have bruises

Strongly agree

Most agree

I quite agree

Partial agreement

Completely disagree

77. Easy to provoke

Strongly agree

Most agree

I quite agree

Partial agreement

Completely disagree

78. Lack of confidence and sense of security

Strongly agree

Most agree

I quite agree

Partial agreement

Completely disagree

79. Worried about changes in face and body shape due to illness

Strongly agree

Most agree

I quite agree

Partial agreement

Completely disagree

80. Unwilling to go out and visit relatives and friends

Strongly agree

Most agree

I quite agree

Partial agreement

Completely disagree

81. Abandoning social and entertainment activities due to illness

Strongly agree

Most agree

I quite agree

Partial agreement

Completely disagree

82. My illness has affected my life and work

Strongly agree

Most agree

I quite agree

Partial agreement

Completely disagree

83. Memory decline

Strongly agree

Most agree

I quite agree

Partial agreement

Completely disagree

84. Worried about future health conditions

Strongly agree

Most agree

I quite agree

Partial agreement

Completely disagree

85. Is novel coronavirus infected in the near future (within 2 months)

yes

no

86. How long after COVID-19 infection, self feeling and body recovery

Within 2 weeks

2 weeks to January

Not fully recovered so far

Will the outbreak of the epidemic affect your choice of medical aesthetics

yes

no

88. Does the inability to conduct medical beauty service within 45 days after COVID-19 infection bother you in medical beauty institutions

yes

no
